# Supplementary material for: Characterization of the MLO gene family in Rosaceae and gene expression analysis in Malus domestica
Source: PubMed Central journal article supplement (PMC4124139; doi:10.1186/1471-2164-15-618), 2014-07-22

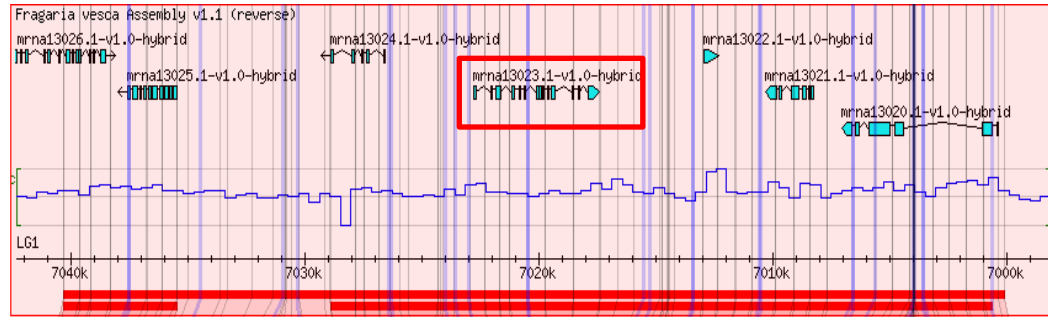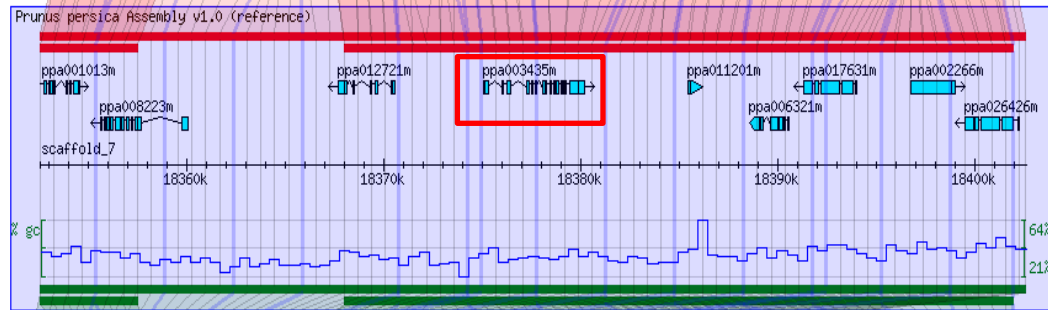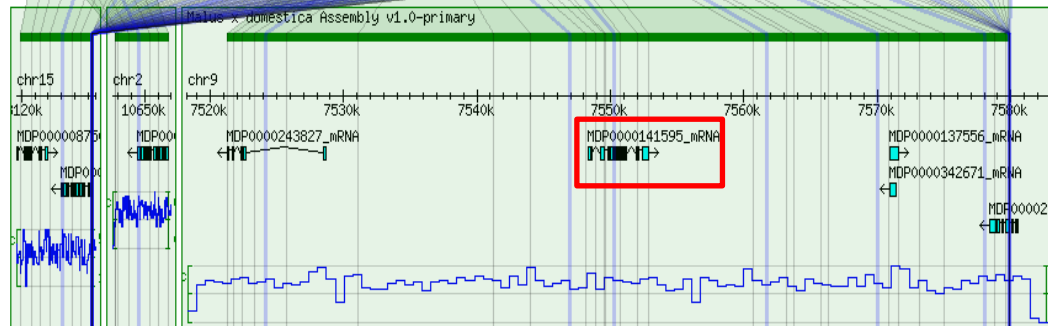

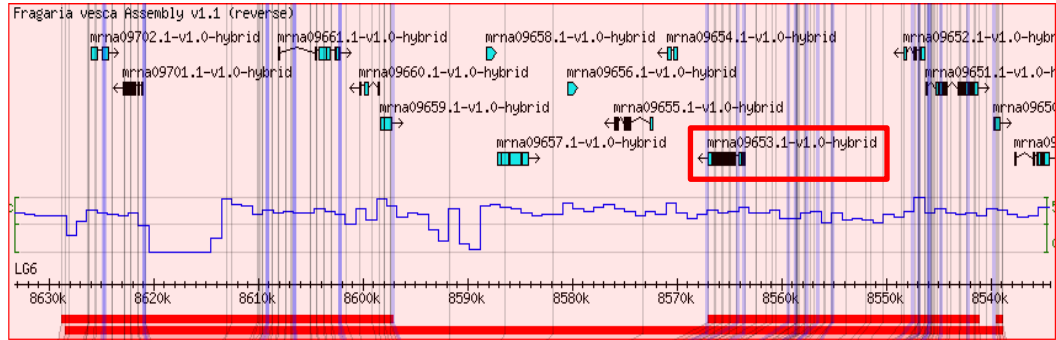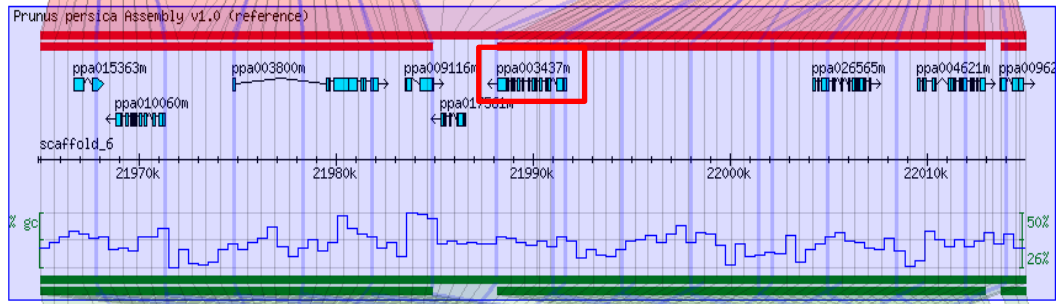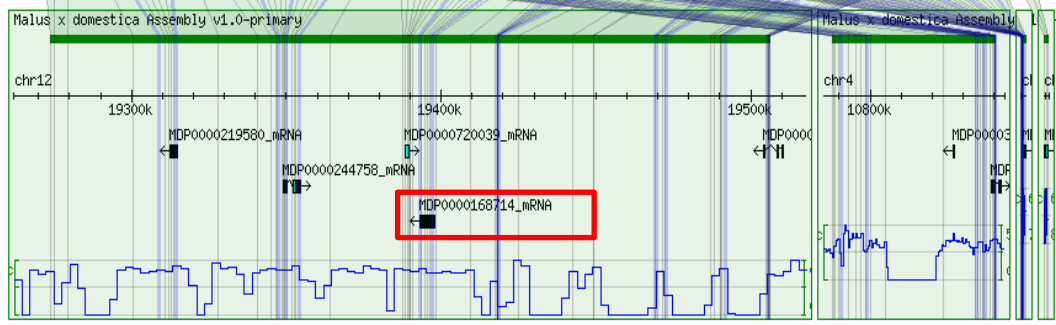

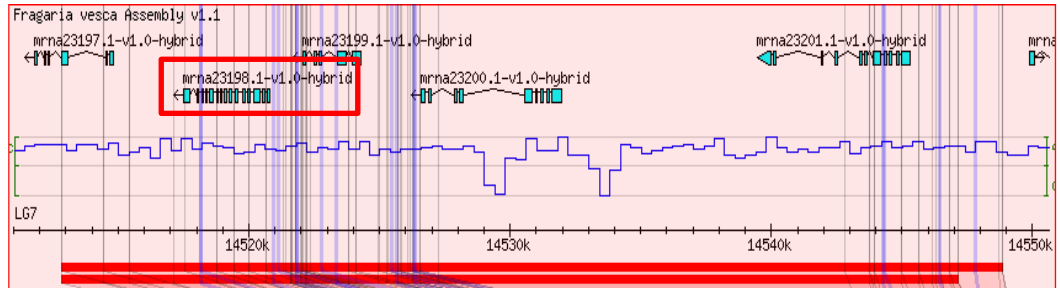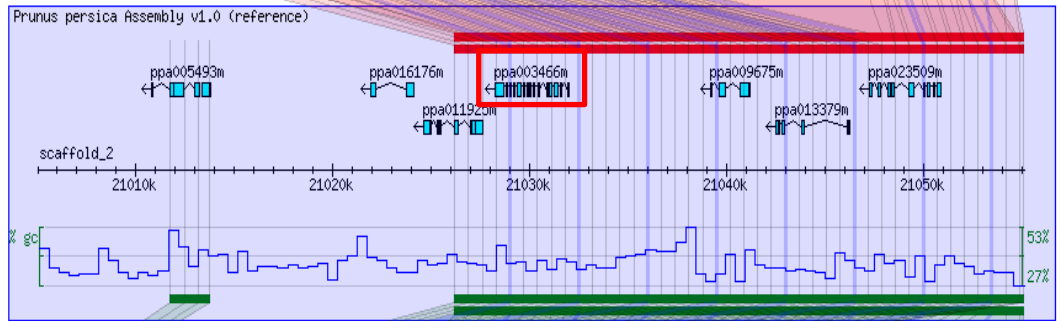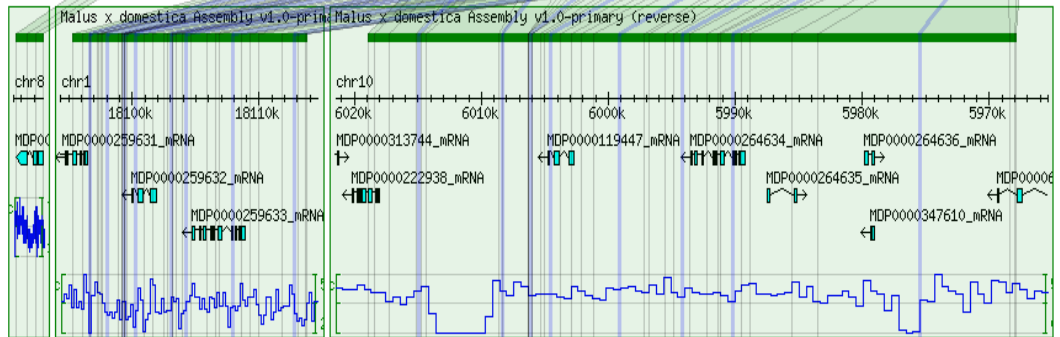

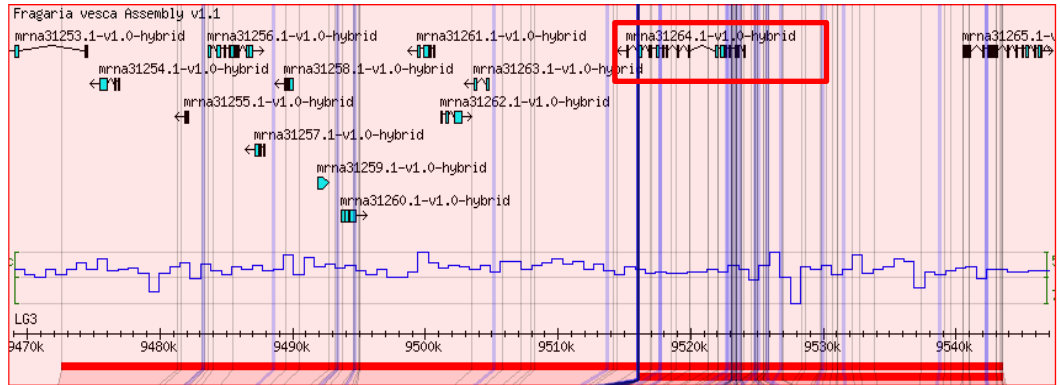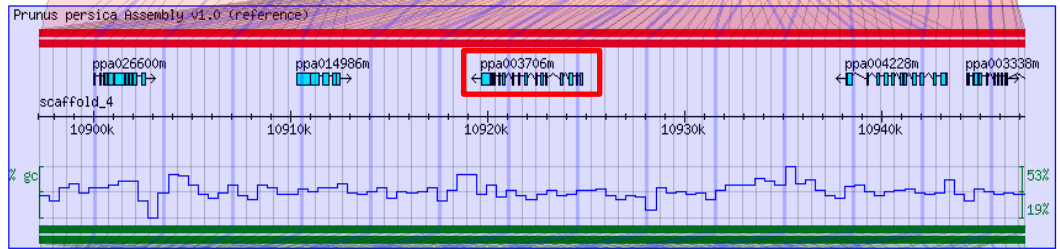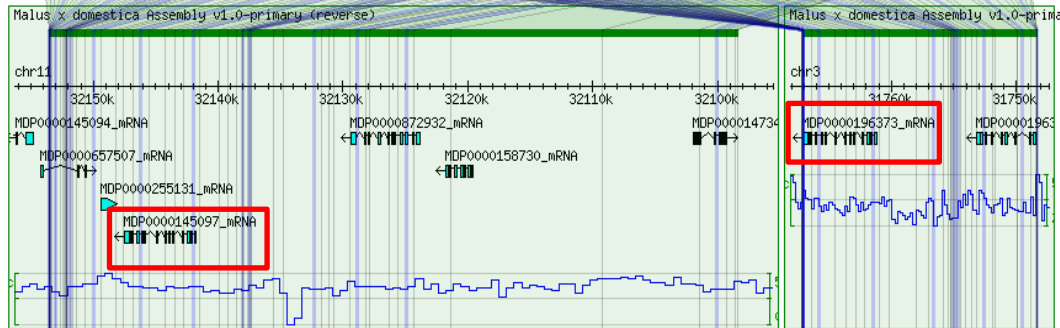

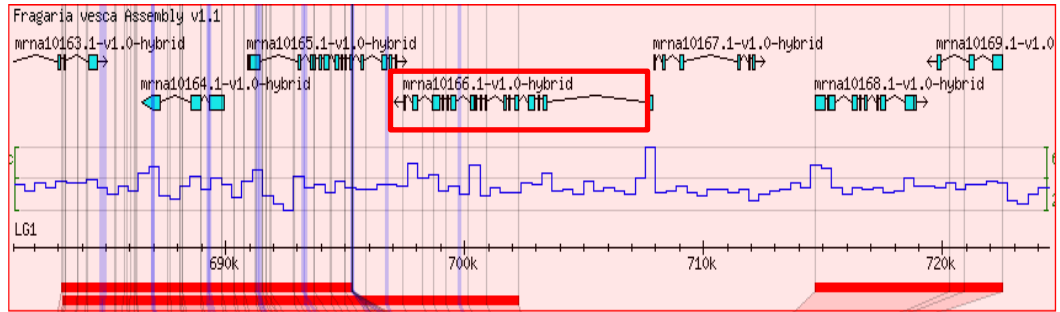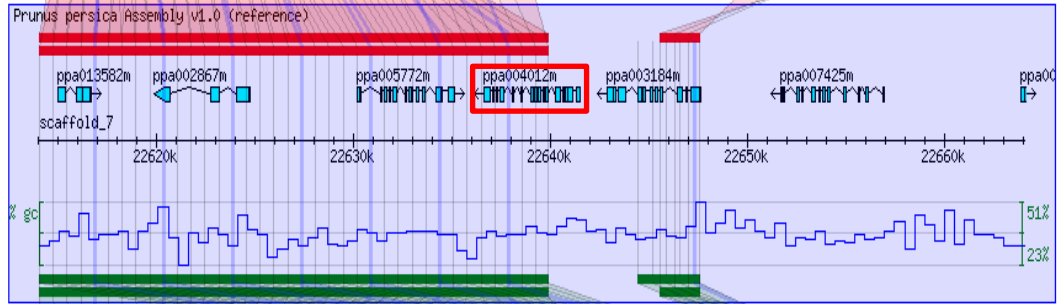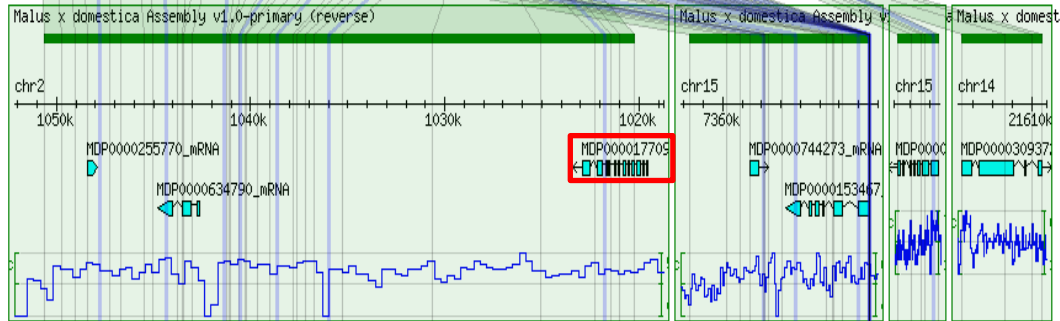

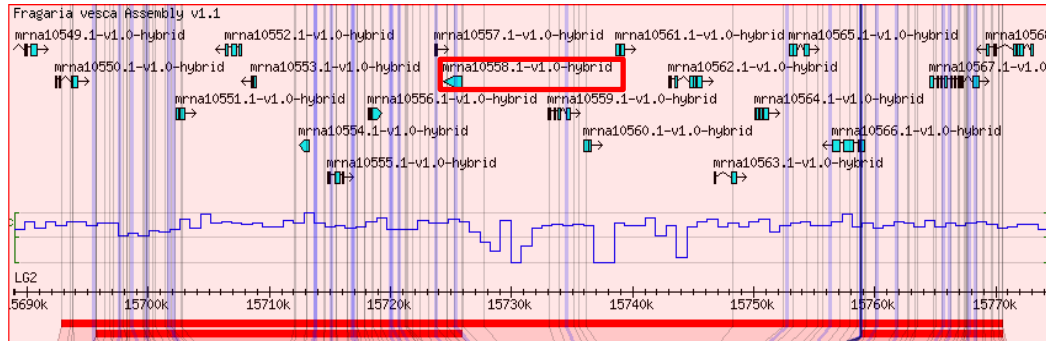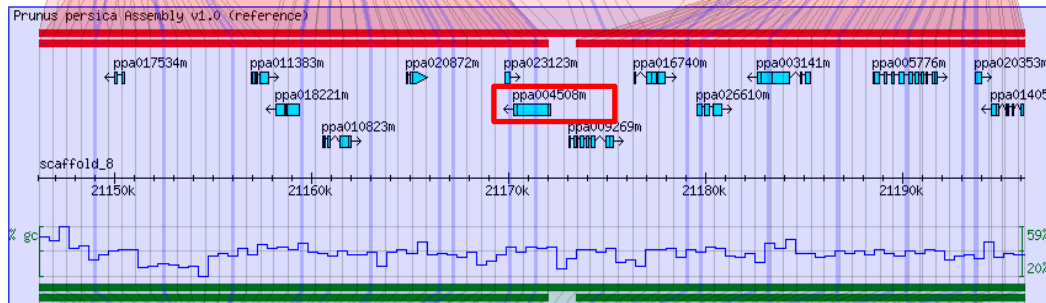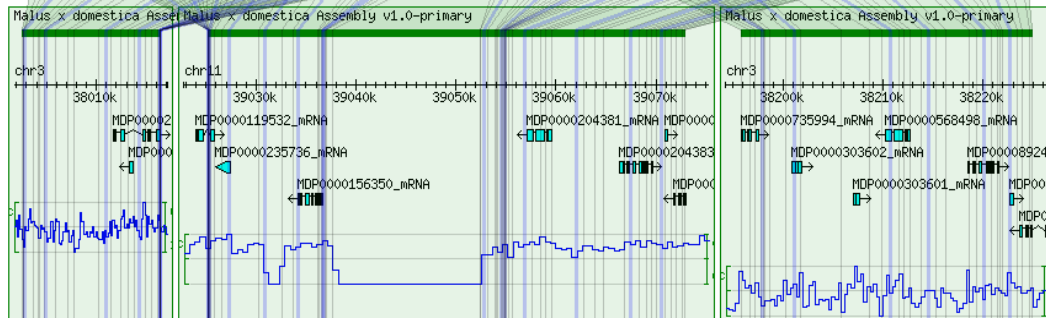

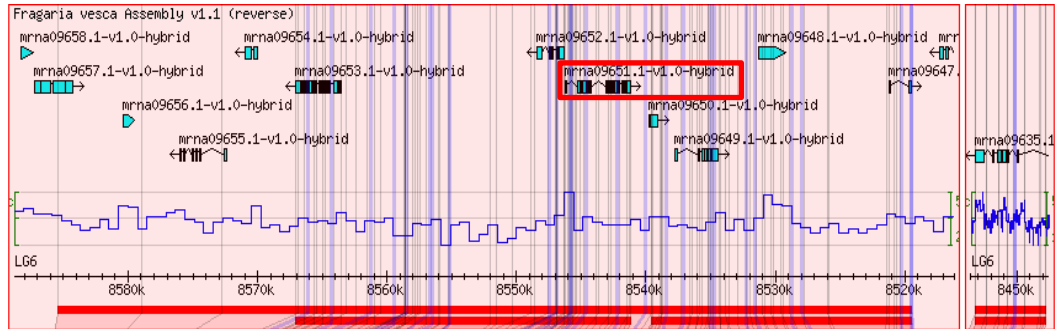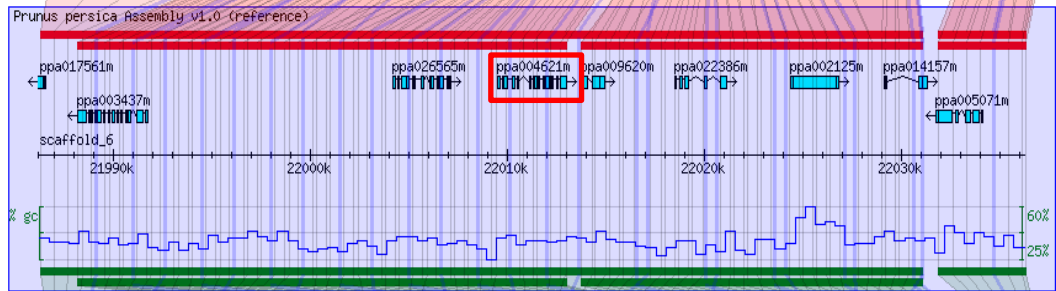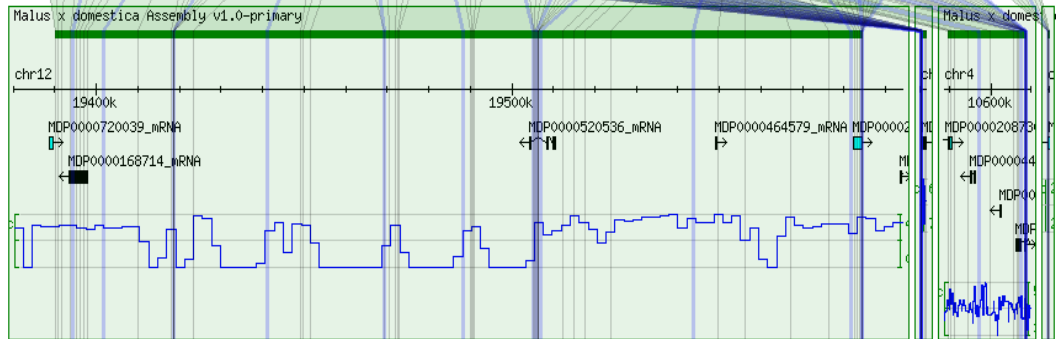

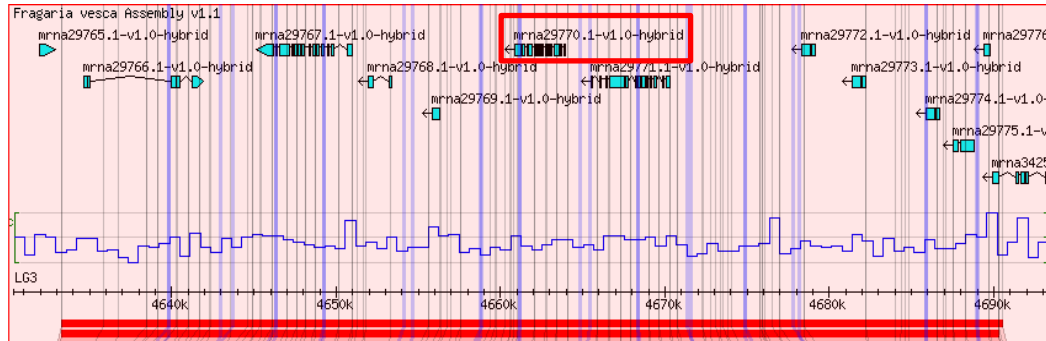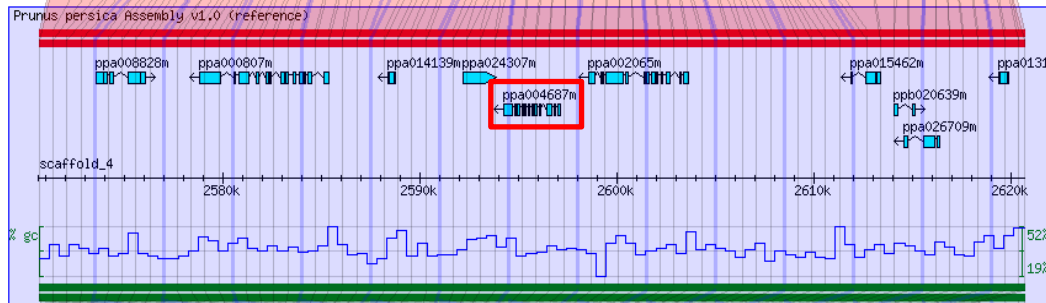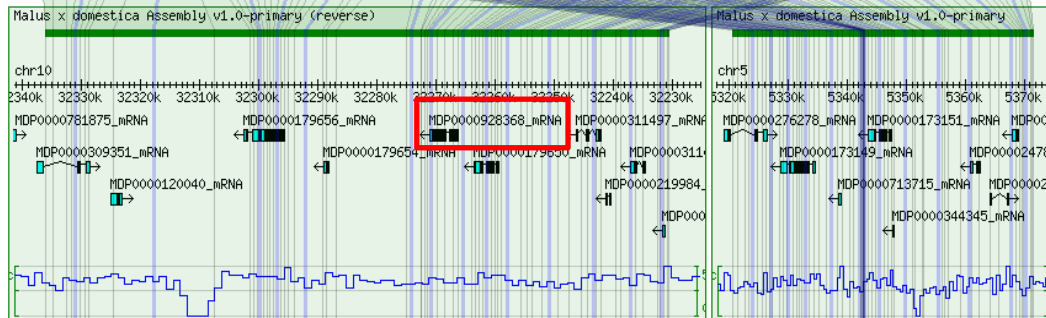



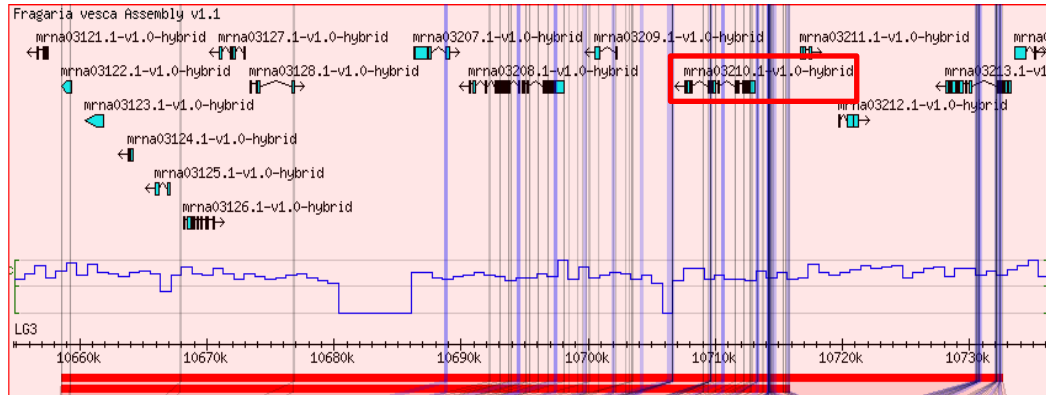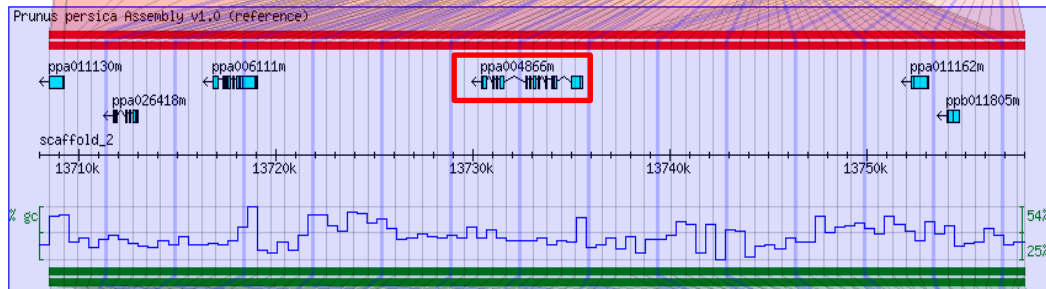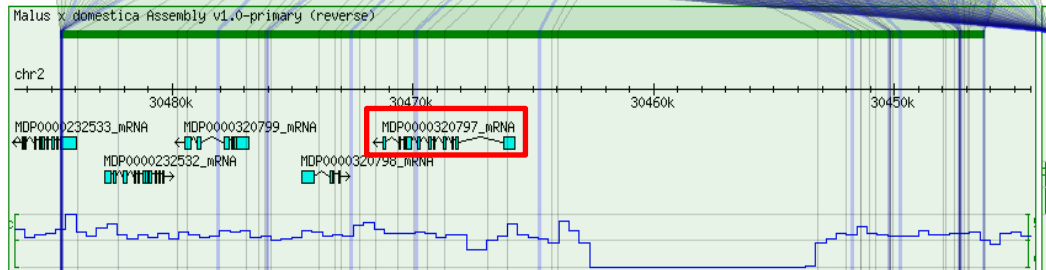

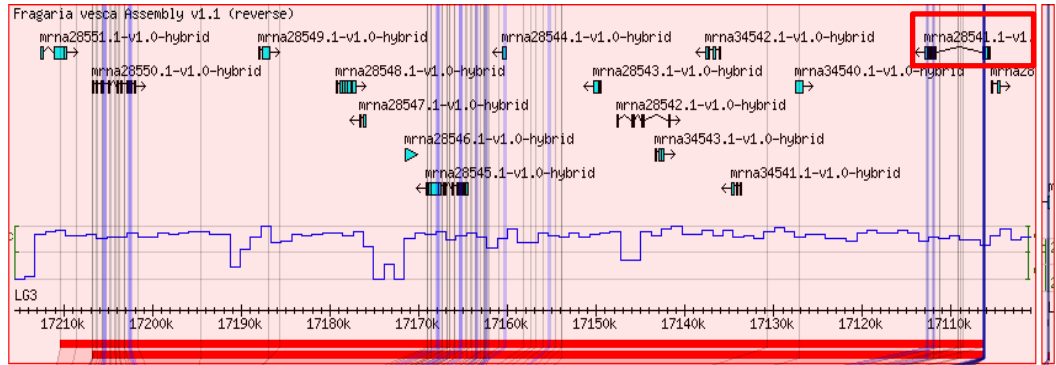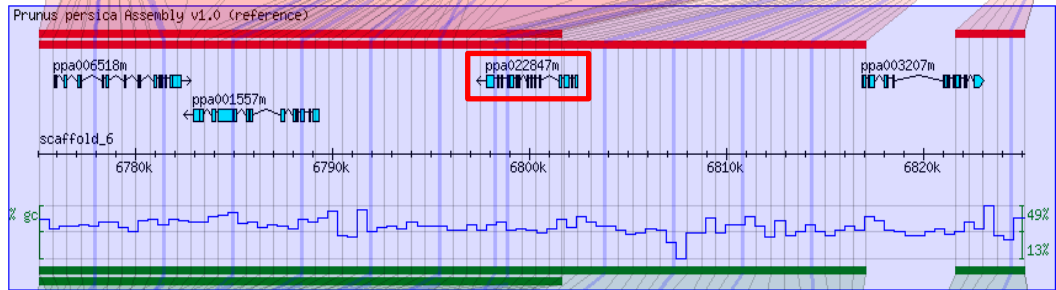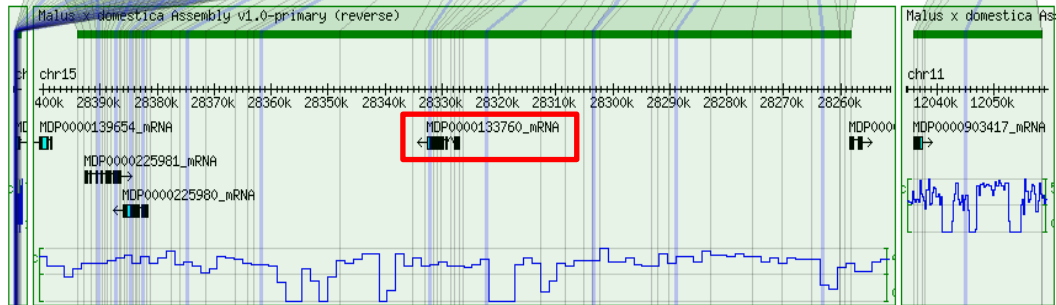



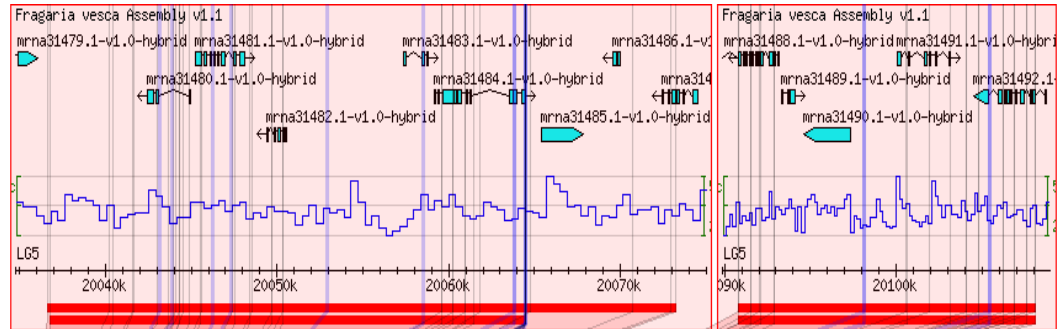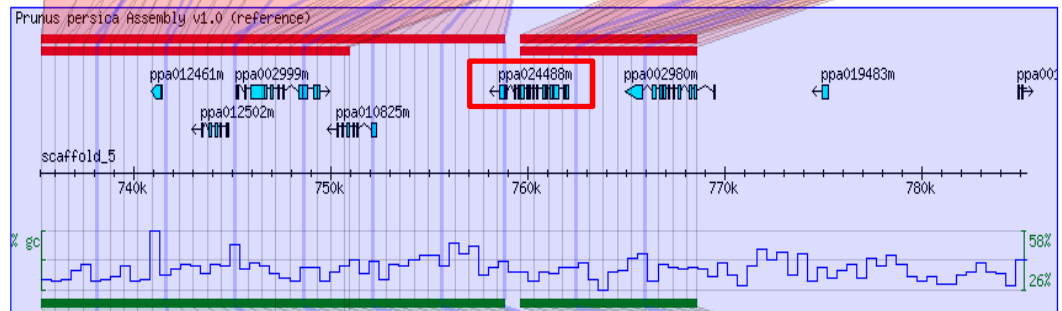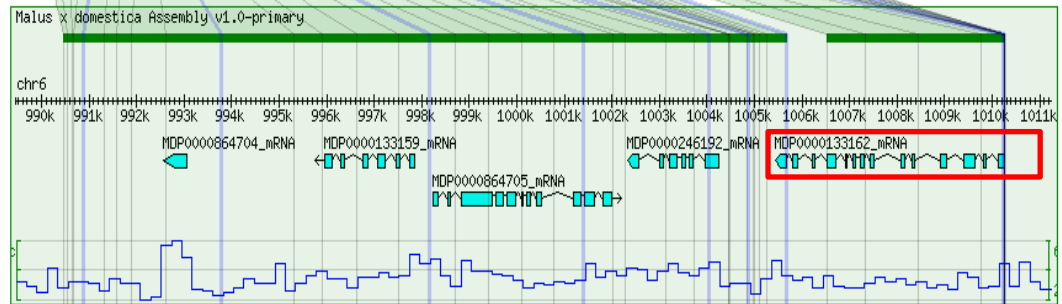

Supplement: 12864_2014_6323_MOESM1_ESM.pdf [file 12864_2014_6323_MOESM1_ESM.pdf]
